# Supplementary material
Source: Springer Nature journal article supplement (https://www.springermedizin.de/resource/supplementary/12950_2009_151_MOESM13_ESM.pdf/9558070)

## Control

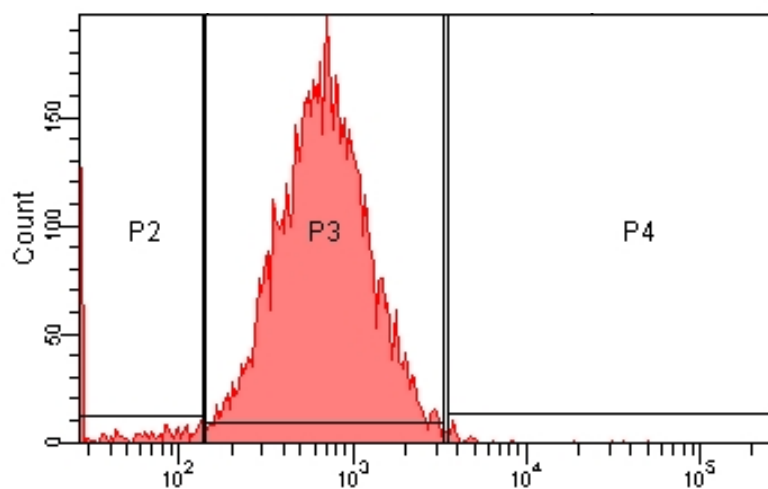

## LPS (1 $\mu\text{g/mL}$ )

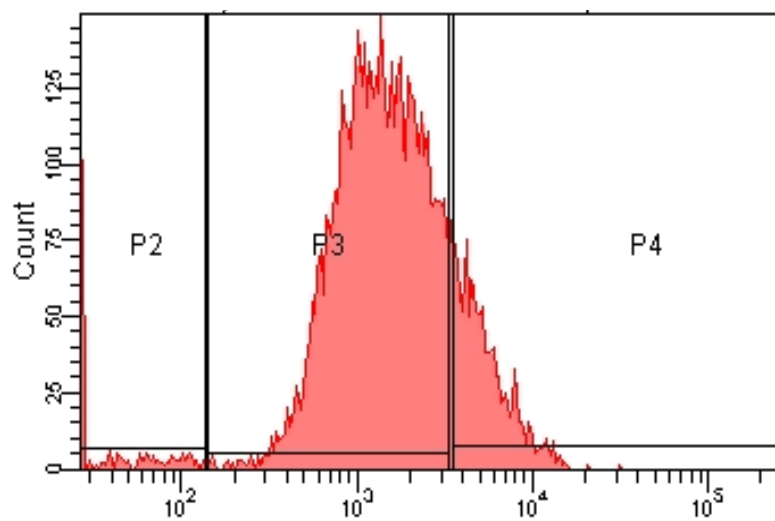

## DFP (2.5 $\mu\text{M}$ )

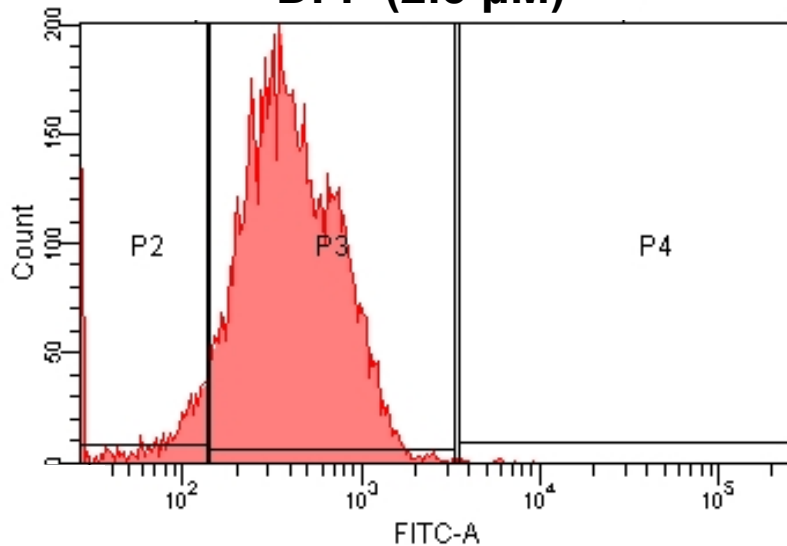

Increasing Oxidative  
Burst Activity

Supplement: MOESM13 [file 9558070]
